# Supplementary material for: Semiparametric modelling of diabetic retinopathy among people with type II diabetes mellitus
Source: Springer Nature journal article supplement (doi:10.1186/s12874-022-01794-4), 2023-01-09
Supplement: MOESM1 [file 12874_2022_1794_MOESM1_ESM.pdf]

### S0.0.1 Descriptive statistics

There were a total of 191 type II diabetic patients in the study, of which 98 (51.3%) had DR. Among the total sample, 114 (59.7%) were female, of which 51 (26.7%) of them had DR. More than half (54.8%) of the total patients in the study were hypertensive, of which 76 (39.8%) of them had DR. Out of patients who used insulin treatment, 40 (20.9%) of them had DR. The total number of patients whose clinical visit was within 1 month interval was 43 (22.6%), of which 7.4% of them had DR. Moreover, of those patients whose clinical visit were within 3 and 6 months interval, 38 (20%) and 46 (24.2%) of them had DR, respectively. The mean age of patients with DR was 58.5 years with a standard deviation of 10.1 years (Table S1). The average diabetic duration since a patient was confirmed to type II diabetes mellitus till the start of the study period was 15.2 years with a standard deviation of 10.9 years. In this study, HbA1c is measured in percentage form known as Diabetes Control and Complications Trial (DCCT) units. The mean HbA1c for a patient with DR was 9.3% with a standard deviation of 2.8%. In addition, the average total cholesterol level for a patient who had DR was 187.6 mg/dL. The mean FBG for a patient with DR was 170.9 mg/dL with a standard deviation of 66 mg/dL (Table S1).

As it can be seen from the box plot in Figure 2, the median total cholesterol level for female was around 186 mmol/L and the median cholesterol level for male patient was around 171 mmol/L.

Table S1: Summary statistics of diabetic retinopathy status of type II diabetic patients vs socio-demographic and clinical variables

| Characteristics | Levels        | Diabetic Retinopathy(DR) |                             |            |
|-----------------|---------------|--------------------------|-----------------------------|------------|
|                 |               | Patient<br>with DR,N(%)  | Patient<br>without DR, N(%) | Total      |
| Gender          | M             | 47 (24.6)                | 30 (15.9)                   | 77 (40.5)  |
|                 | F             | 51 (26.7)                | 63 (32.8)                   | 114 (59.5) |
| Hypertension    | No            | 22 (11.5)                | 63 (32.9)                   | 85 (44.4)  |
|                 | Yes           | 76 (39.8)                | 30 (15.8)                   | 106 (54.8) |
| IT              | No            | 58 (30.4)                | 79 (41.4)                   | 137 (71.7) |
|                 | Yes           | 40 (20.9)                | 14 (7.3)                    | 54 (28.3)  |
| FCV             | every 1 month | 14 (7.4)                 | 29 (15.2)                   | 43 (22.6)  |
|                 | every 3 month | 38 (20.0)                | 34 (17.9)                   | 72 (37.9)  |
|                 | every 6 month | 46 (24.2)                | 29 (15.3)                   | 75 (39.5)  |
|                 |               | mean(sd)                 | mean(sd)                    | $n = 191$  |
| Age             |               | 58.5(10.1)               | 56 (10.4)                   |            |
| DD              |               | 15.2(10.9)               | 9.2 (8.8)                   |            |
| HbA1c           |               | 9.3 (2.8)                | 7.09 (2.3)                  |            |
| CL              |               | 187.6(56.2)              | 179.3(41.5)                 |            |
| FBG             |               | 170.9 (66.0)             | 160.7 (60.6)                |            |
